# Supplementary material for: Impact of acute kidney injury in deceased donors with high Kidney Donor Profile Index on posttransplant clinical outcomes: a multicenter cohort study
Source: PubMed Central journal article supplement — Kidney Res Clin Pract. 2021 Mar 5;40(1):162–74. doi: 10.23876/j.krcp.20.083 (PMC8041636; doi:10.23876/j.krcp.20.083), 2021-03-05
Supplement: j-krcp-20-083suppl.pdf [file j-krcp-20-083suppl.pdf]

**Supplementary Table 1.** Comparison of the incidence of death-censored graft failure according to the stages of AKI in high or low KDPI donor KTRs

| Variable  | High KDPI-KTR                    |                                  |         | Low KDPI-KTR                     |                                  |         |
|-----------|----------------------------------|----------------------------------|---------|----------------------------------|----------------------------------|---------|
|           | Death-censored graft failure (-) | Death-censored graft failure (+) | p-value | Death-censored graft failure (-) | Death-censored graft failure (+) | p-value |
| AKI stage |                                  |                                  | 0.168   |                                  |                                  | 0.182   |
| Non-AKI   | 88 (28.7)                        | 11 (35.5)                        |         | 160 (53.2)                       | 11 (61.1)                        |         |
| Stage 1   | 77 (25.1)                        | 4 (12.9)                         |         | 64 (21.3)                        | 6 (33.3)                         |         |
| Stage 2   | 65 (21.2)                        | 4 (12.9)                         |         | 29 (9.6)                         | 1 (5.6)                          |         |
| Stage 3   | 77 (25.1)                        | 12 (38.7)                        |         | 48 (15.9)                        | 0                                |         |

Data are expressed as number (%).

KDPI, Kidney Donor Profile Index; KTR, kidney transplant recipient; AKI, acute kidney injury.
